# Supplementary material for: Tuning the activity of the inert MoS2 surface via graphene oxide support doping towards chemical functionalization and hydrogen evolution: a density functional study
Source: Royal Society of Chemistry journal article supplement (doi:10.1039/c7cp06636h), 2017-12-11
Supplement: c7cp06636h1.pdf [file c7cp06636h1.pdf]

## Supporting Information

### **Tuning the Activity of the Inert MoS<sub>2</sub> Surface via Graphene Oxides Support Doping towards the Chemical Functionalization and Hydrogen Evolution: A Density Functional Study**

Shaobin Tang,<sup>\*,†</sup> Weihua Wu,<sup>†</sup> Shiyong Zhang,<sup>†</sup> Dongnai Ye,<sup>†</sup> Ping Zhong,<sup>†</sup>  
Xiaokang Li,<sup>†</sup> Liangxian Liu,<sup>†</sup> and Ya-Fei Li<sup>‡</sup>

<sup>†</sup>*Key Laboratory of Organo-Pharmaceutical Chemistry of Jiangxi Province,  
Gannan Normal University, Ganzhou 341000, China*

<sup>‡</sup>*Jiangsu Key Laboratory of Biofunctional Materials, College of Chemistry and  
Materials Science, Nanjing Normal University, Nanjing 210023, China*

\*Corresponding author e-mail: [tsb1980@xmu.edu.cn](mailto:tsb1980@xmu.edu.cn)

Table S1: The binding energy ( $E_b$ ) and diffusion energy barrier (TS) (in eV) for H adsorption on MoS<sub>2</sub>/graphene and GOs with 0.32 epoxy concentration by DMOL3 and VASP.

| structure                       | DMOL3  |                     |      | VASP   |        |      |
|---------------------------------|--------|---------------------|------|--------|--------|------|
|                                 | $E_b$  |                     | TS   | $E_b$  |        | TS   |
|                                 | PBE-D2 | PBE-D2 <sup>a</sup> |      | PBE-D2 | PBE-D3 |      |
| <b>MoS<sub>2</sub>/Graphene</b> | 0.45   | 0.5                 | 0.48 | 0.49   | 0.51   | 0.43 |
| <b>MoS<sub>2</sub>/GO</b>       | 0.8    | 0.84                | 0.22 | 0.75   | 0.77   | 0.24 |

<sup>a</sup>  $E_b$  with the dipole correction.

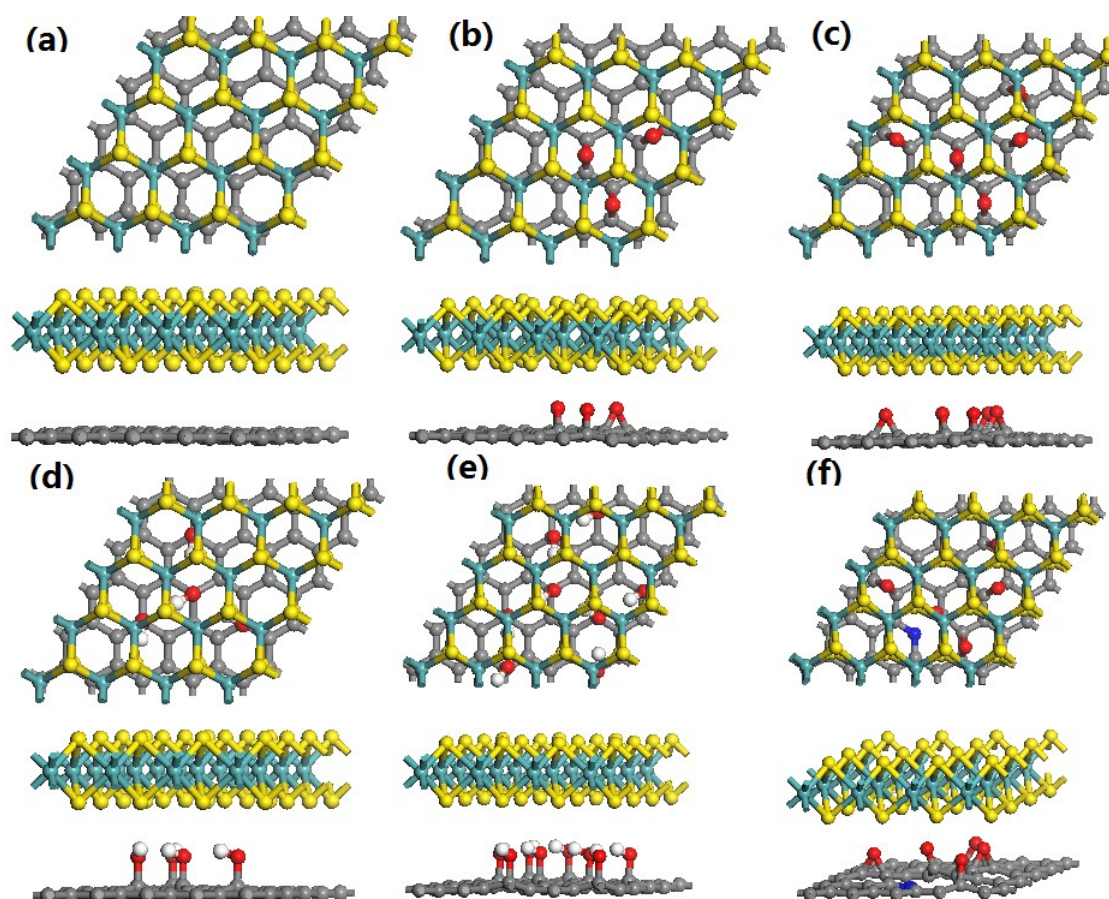

**Figure S1.** Top and side view of the geometrical structures of 2H-MoS<sub>2</sub> supported on graphene and GOs with different the epoxy and hydroxyl group concentrations and N doping.

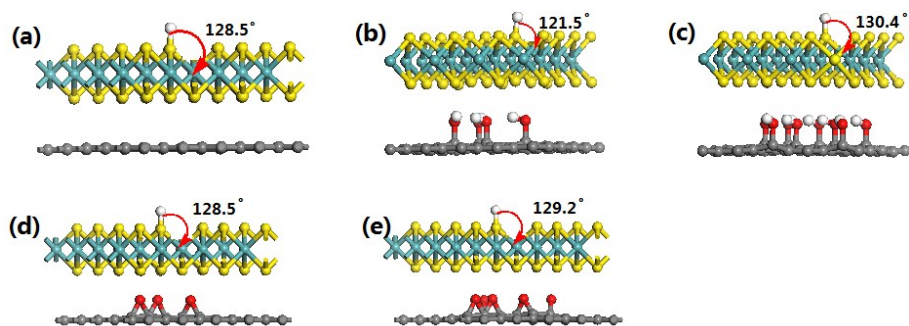

**Figure S2.** Comparison of the geometrical structures of H-adsorbed on MoS<sub>2</sub> supported on different support. The red arrows shows the bond angle  $\theta$  of of H—S—Mo. Some S atoms are omitted.

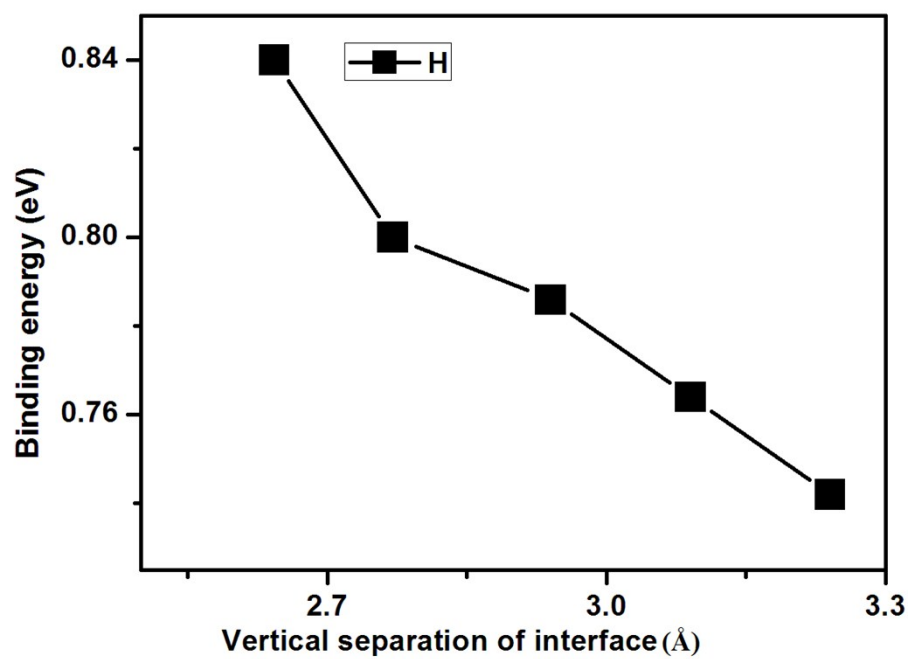

**Figure S3.** The binding energy for H adsorption on MoS<sub>2</sub>/GOs with 0.32 epoxy concentration as a function of the vertical separation of interface.

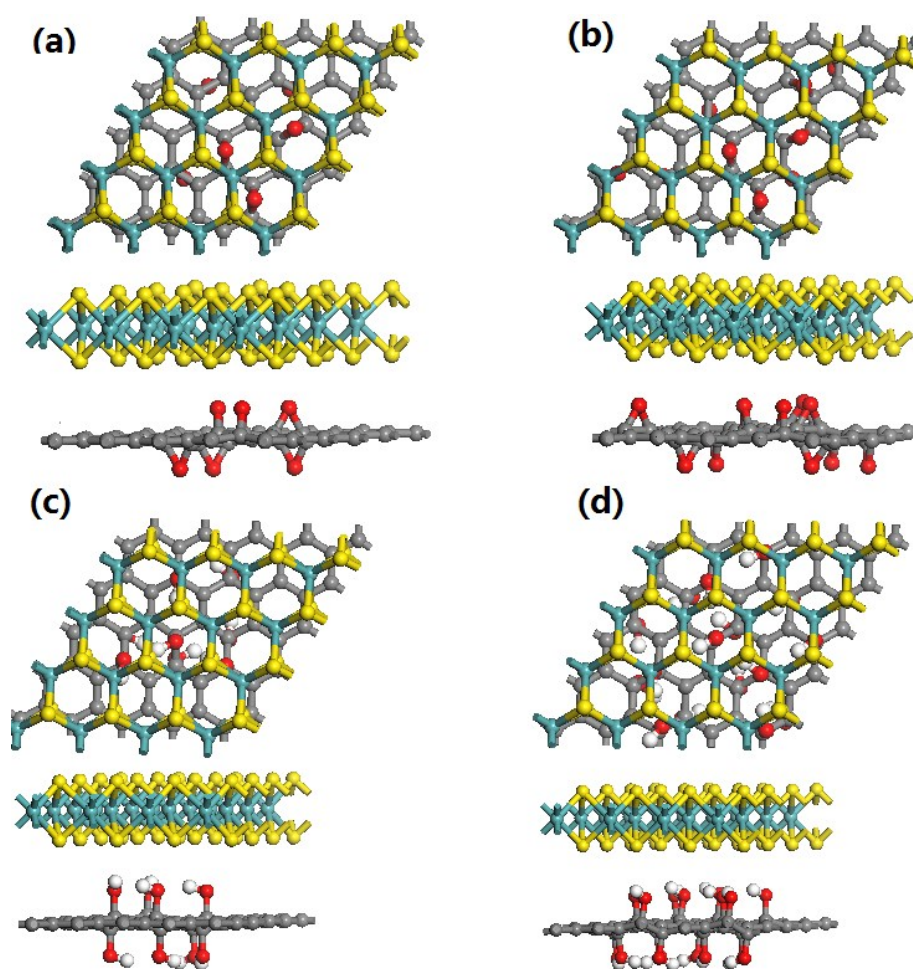

**Figure S4.** Top and side view of the geometrical structures of 2H-MoS<sub>2</sub> supported on two-side GOs with (a, b) the epoxy and (c, d) hydroxyl groups. The number of oxygen groups at each side are same. (a)-(d) 0.24, 0.4, 0.16, and 0.32 O concentrations, respectively.

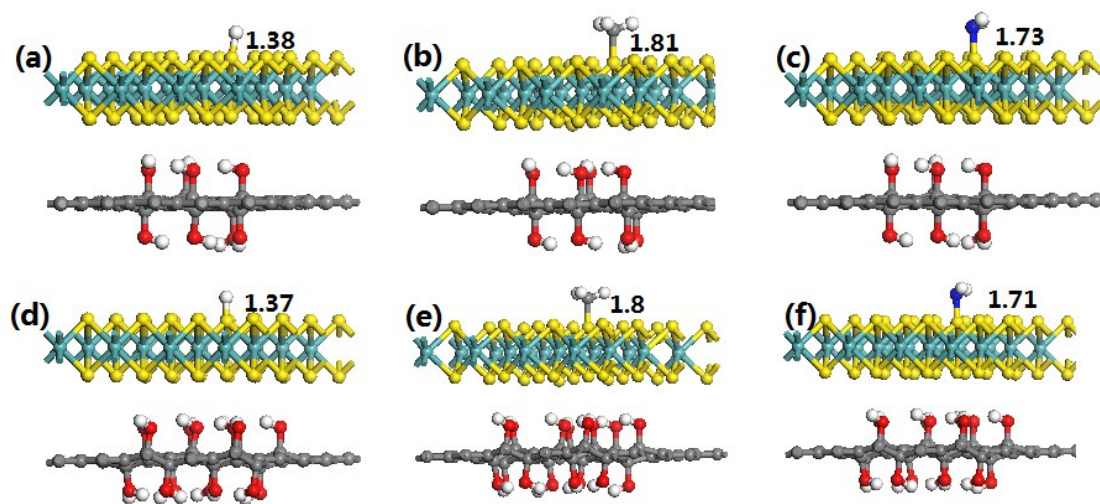

**Figure S5.** The geometrical structures (distance in Å) for adsorption of H, CH<sub>3</sub>, and NH<sub>2</sub> on 2H-MoS<sub>2</sub>/GOs with the hydroxyl groups.



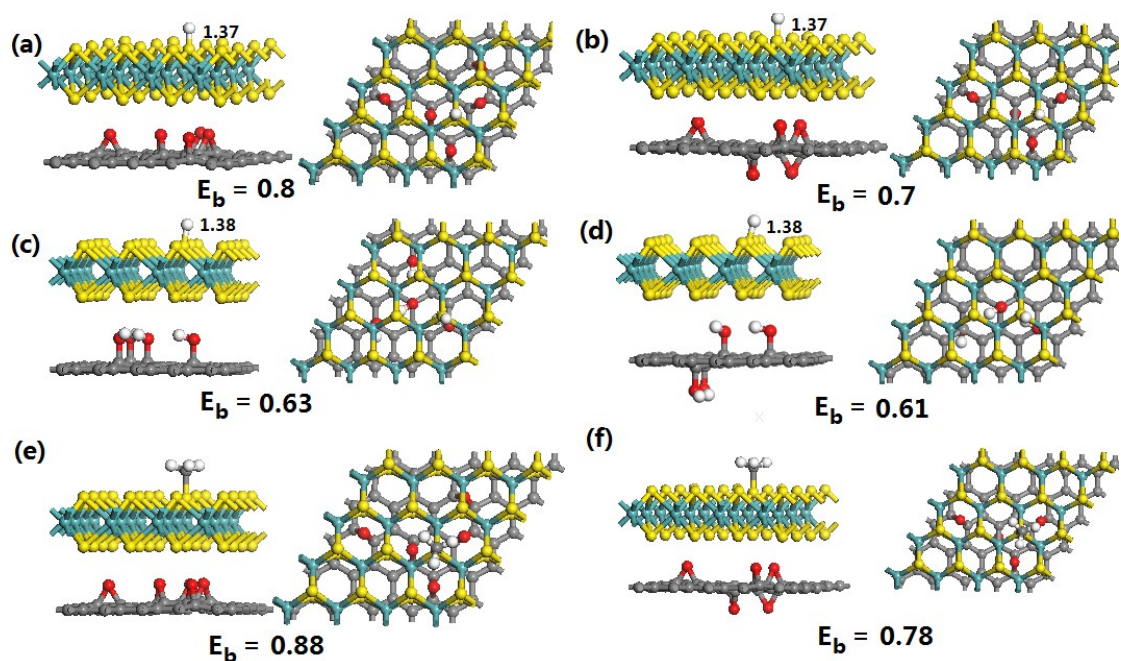

**Figure S6.** Top and side view of the geometrical structures for H and CH<sub>3</sub> adsorbed on MoS<sub>2</sub>/GOs and the corresponding binding energy (eV): oxygen groups (a, c, and e) located at the same side and (b, d, and f) at both side.



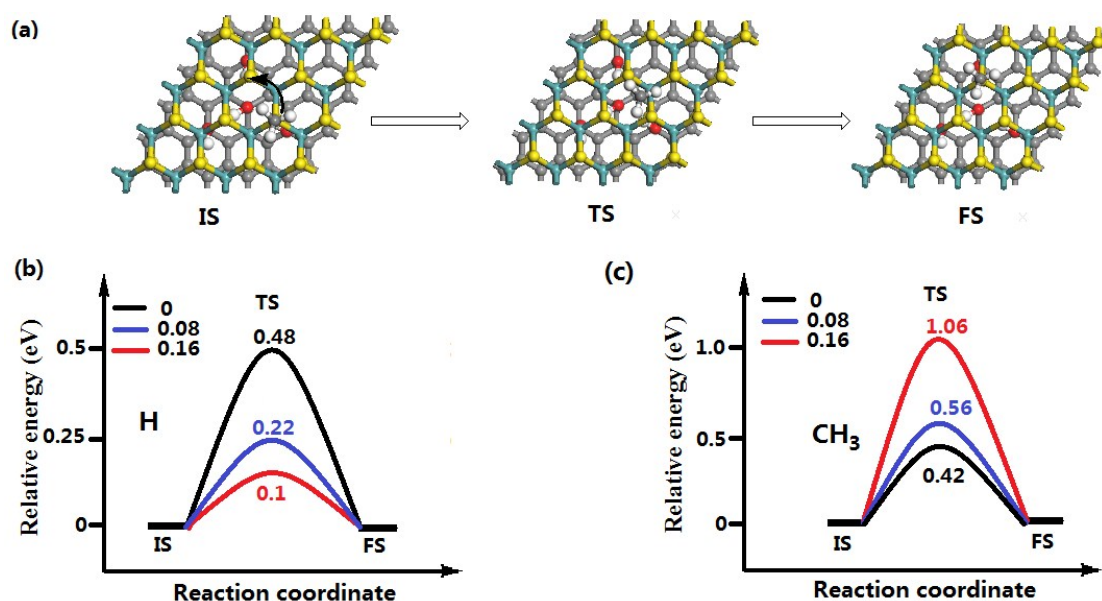

**Figure S7.** (a) The geometrical structures of the initial, transition, and final states for diffusion of H atom on MoS<sub>2</sub>/GOs with 0.08 ratio of the hydroxyl to carbon. It notes that the black arrow marks the diffusion path of H from the adsorption S site to neighboring S. The relative energy paths for diffusion of adsorbed (b) H and (c) CH<sub>3</sub> on MoS<sub>2</sub>/GOs with the different hydroxyl group concentration.

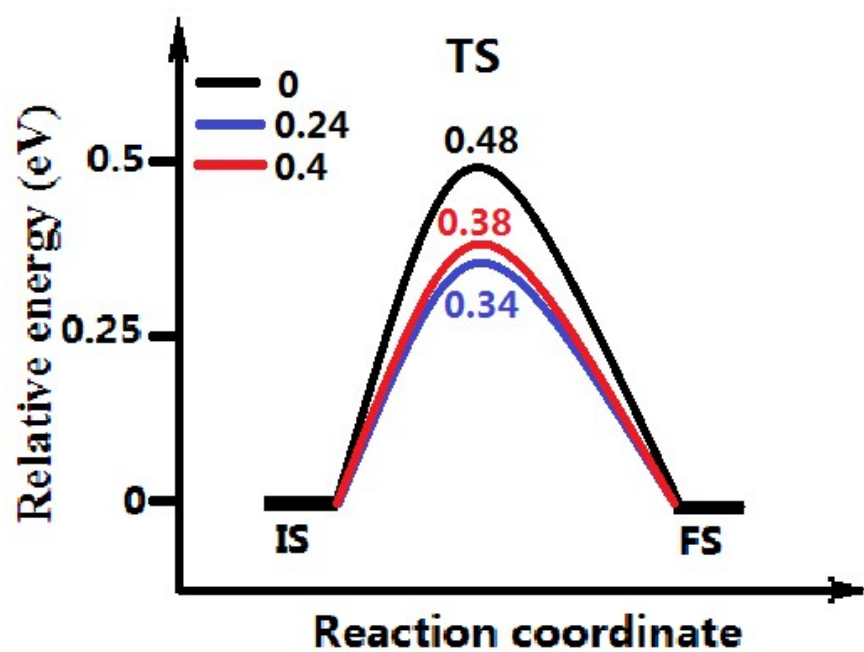

**Figure S8.** The relative energy paths for diffusion of adsorbed H on MoS<sub>2</sub>/GOs with two-side epoxy groups.

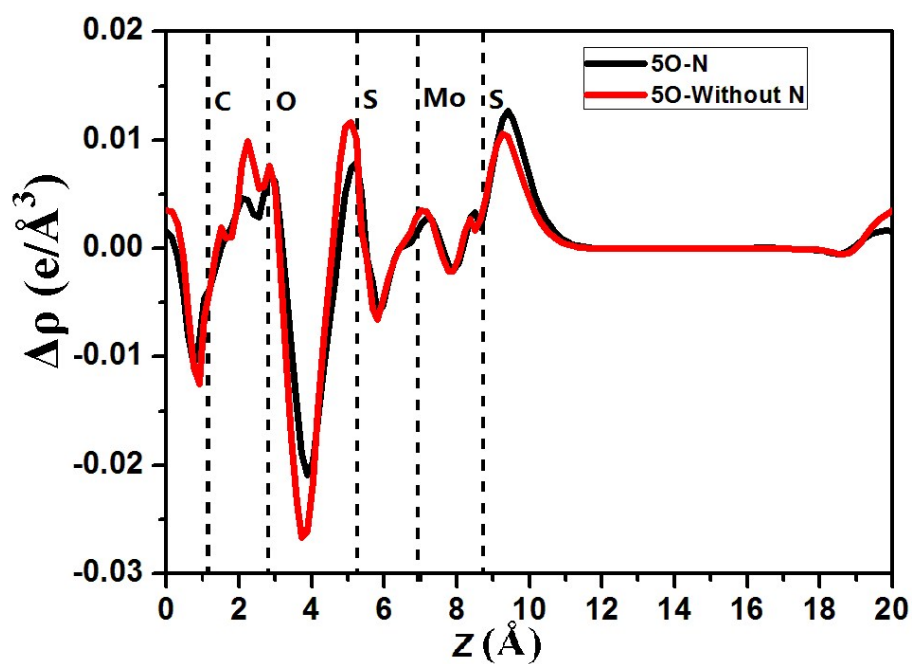

**Figure S9.** The profile of the planar averaged charge density difference for the MoS<sub>2</sub>/GOs hybrids with and without N doping as a function of position in the  $z$ -direction. The vertical dashed lines denote the central location of each atomic layer of the MoS<sub>2</sub> and GOs.

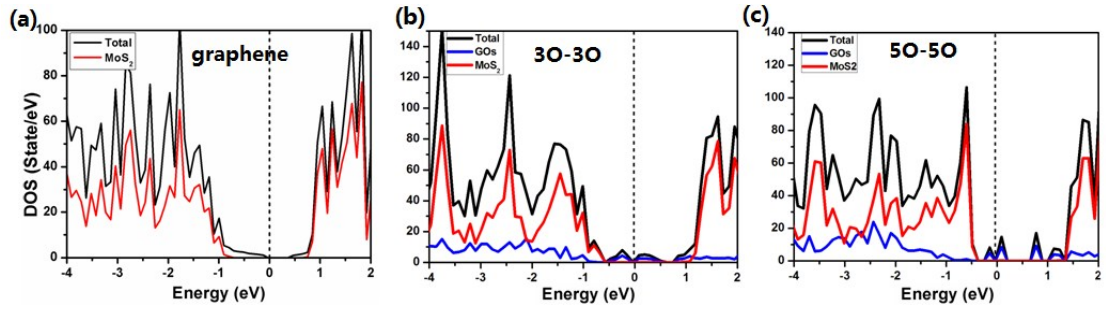

**Figure S10.** Total DOS and projected DOS (PDOS) of MoS<sub>2</sub>/graphene and two-side GOs: (a) graphene and (b, c) GOs with 0.24 and 0.4 epoxy concentrations, respectively. The Fermi level is set to 0.

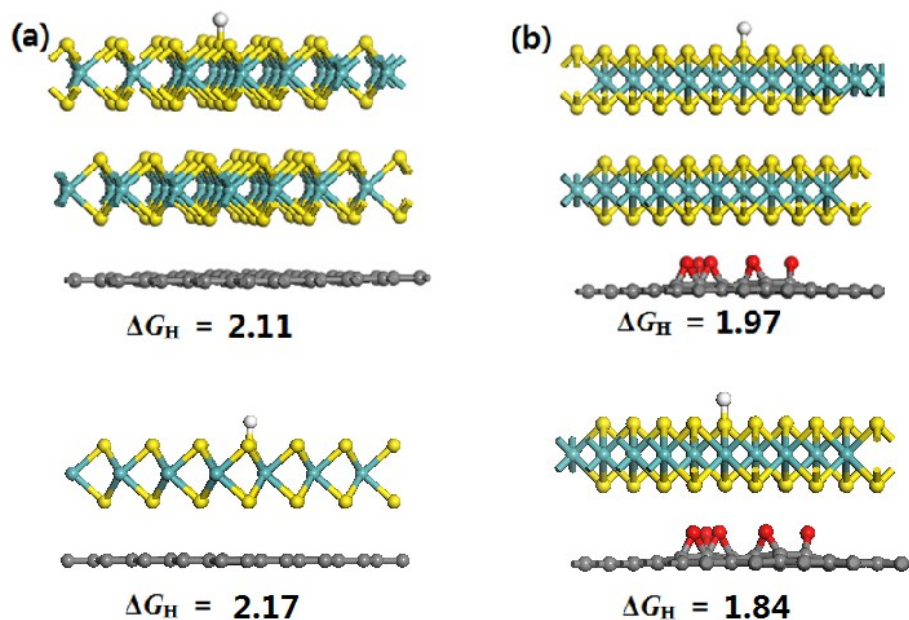

**Figure S11.** The geometrical structures of (a) monolayer and (b) bilayer MoS<sub>2</sub> supported on graphene and GOs with 0.32 ratio of O to C for H adsorption and the corresponding  $\Delta G_H$  (in eV).

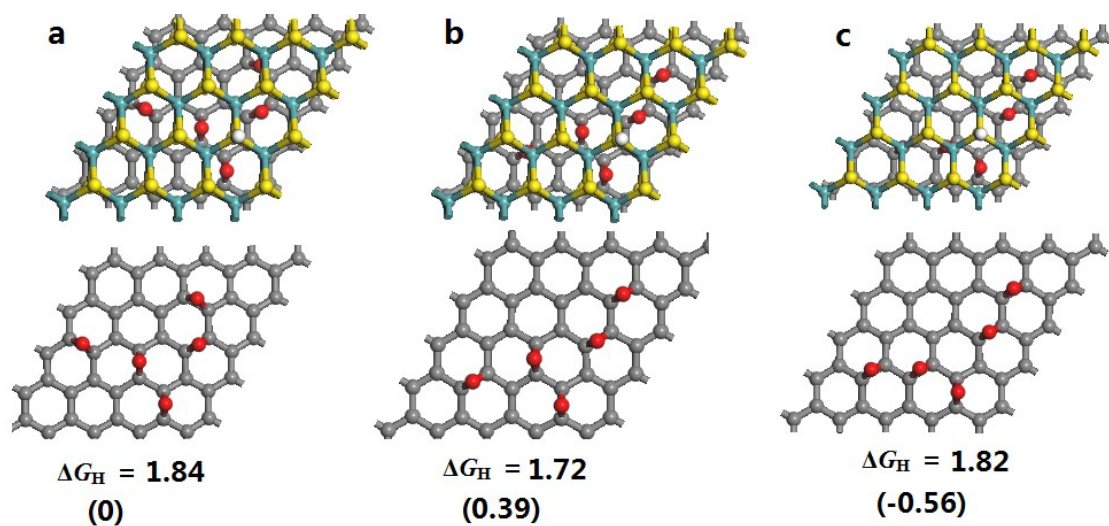

**Figure S12.** The geometrical structures of three MoS<sub>2</sub>/GOs heterostructures (top panel) and GOs support (bottom panel) with fixed epoxy content. The corresponding  $\Delta G_H$  (in eV) of S site and relative energies (in bracket) (in eV) of heterostructures with respect to the structure in (a).

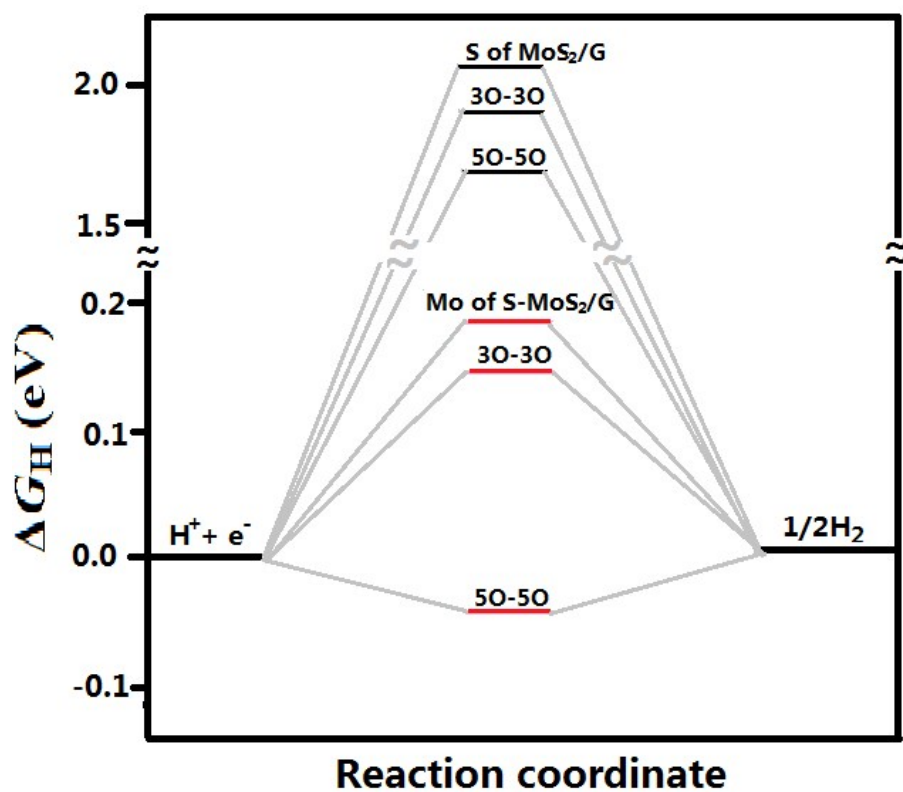

**Figure S13.** HER free-energy diagram for the S site (black line) of MoS<sub>2</sub> monolayer and exposed Mo site (red line) of S-MoS<sub>2</sub> supported on GOs with two-side epoxy groups (namely **m**O-mO, where the **m** represents the number of oxygen functional group at each side of graphene)



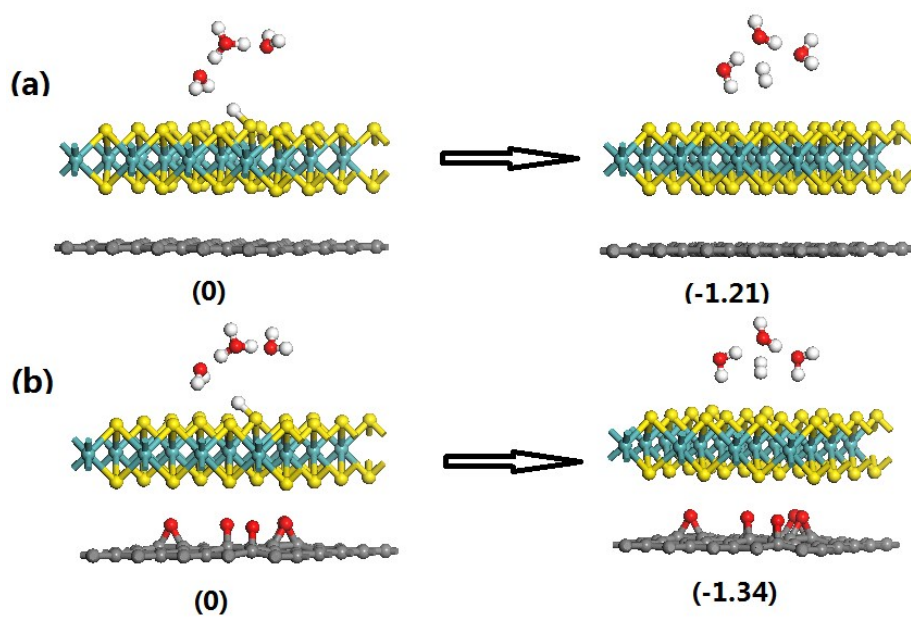

**Figure S14.** The geometrical structures and relative energy (in eV) for  $\text{H}_2$  production on  $\text{MoS}_2$  supported on (a) graphene and (b) GOs from Heyrovsky mechanism.

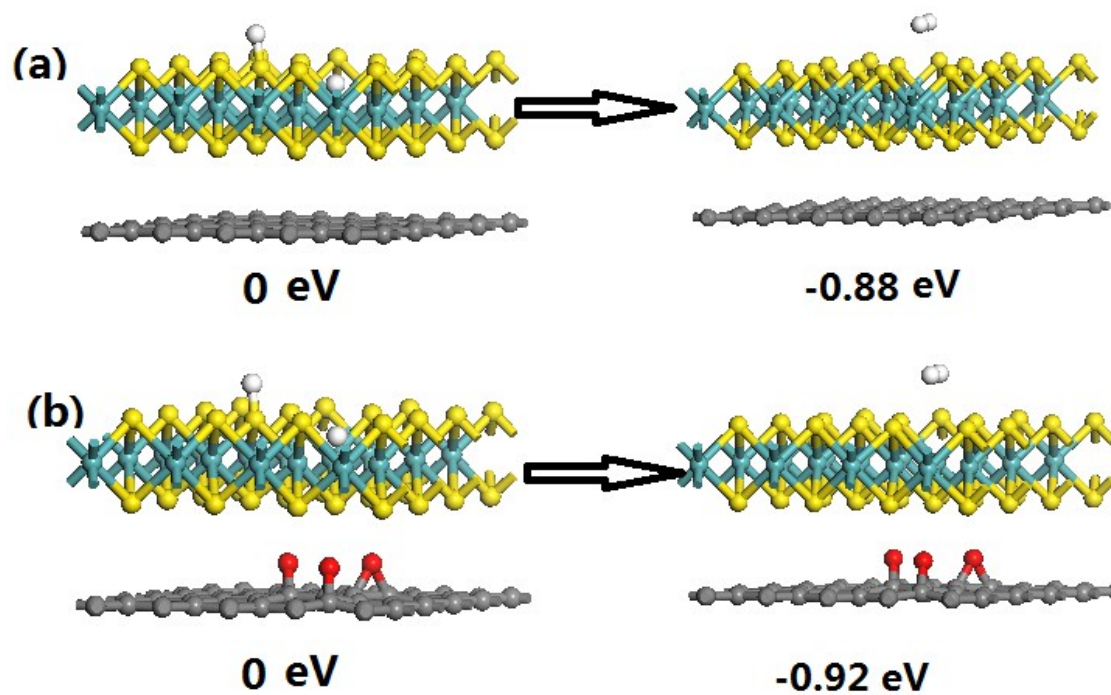

**Figure S15.** The geometrical structures for  $H_2$  formation process on  $S-MoS_2$  supported on (a) graphene and (b) GOs through Tafel mechanism and the relative energy.

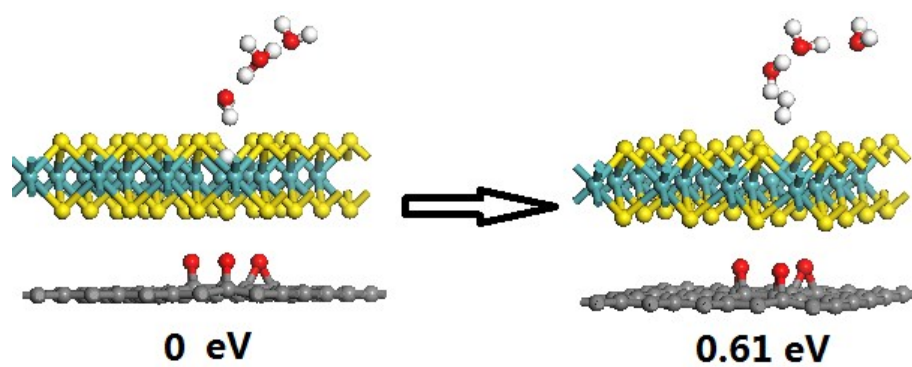

**Figure S16.** The geometrical structures and relative energy (in eV) for H<sub>2</sub> production on S-MoS<sub>2</sub>/GOs through Heyrovsky mechanism.

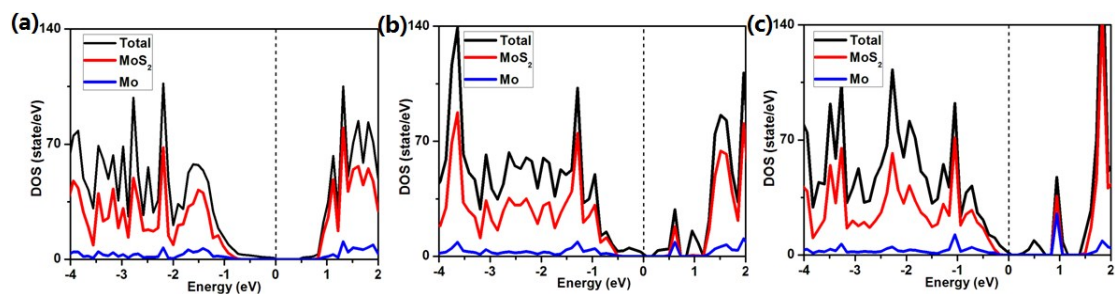

**Figure S17.** Total DOS and projected DOS (PDOS) of MoS<sub>2</sub> and the exposed Mo atoms for S-MoS<sub>2</sub> supported on (a) graphene and (b, c) GOs with (b) 0.12 and (c) 0.2 epoxy concentrations. The Fermi level is set to 0.
